# Supplementary material for: Decorating polymer beads with 1014 inorganic-organic [2]rotaxanes as shown by spin counting
Source: PubMed Central journal article supplement (PMC9814693; doi:10.1038/s42004-022-00689-1), 2022-06-20
Supplement: 42004_2022_689_MOESM2_ESM.pdf [file 42004_2022_689_MOESM2_ESM.pdf]

## Description of Additional Supplementary Files

**File name:** Supplementary Data 1

**Description:** Crystallographic information files.
